# Supplementary material for: Oxidative Stress Is Associated with Overgrowth in Drosophila l(3)mbt Mutant Imaginal Discs
Source: MDPI journal article supplement (doi:10.3390/cells11162542), 2022-08-16
Supplement: s1 [file s1]

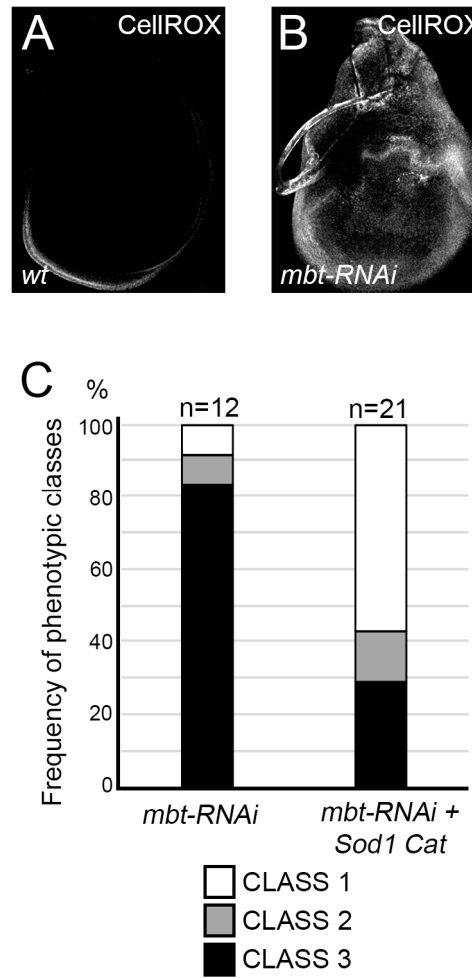

**Figure S1.** Oxidative stress detected with CellROX Deep Red and effect of the ROS scavengers Sod1 and Cat in *mbt-RNAi* mutant wing imaginal discs.
